# Supplementary material for: Effects of interfacial tension on formation of poly(ethylene oxide)-block-polystyrene micelles from emulsions
Source: Royal Society of Chemistry journal article supplement (doi:10.1039/c4ra14157a), 2014-12-08
Supplement: c4ra14157a1.pdf [file c4ra14157a1.pdf]

*Electronic Supplementary Information*

## Effects of Interfacial Tension on Formation of Poly(ethylene oxide)-*block*-Polystyrene Micelles from Emulsion

*Mei Su, Lulu Wang, Guangyu Zhang, Yan Huang, Zhaohui Su\**

State Key Laboratory of Polymer Physics and Chemistry, Changchun Institute of Applied Chemistry, Chinese Academy of Sciences, Changchun 130022, P. R. China

\*E-mail: zhsu@ciac.ac.cn

**Measurement of the interfacial tension between the oil and the aqueous phases by the pendant drop method.** As shown in Figure S1, the equatorial diameter  $D$  and the diameter  $d$  at distance  $D$  from the bottom of the drop are measured from the drop profile and the interfacial tension is calculated using the following equation:  $\gamma = g(\rho_A - \rho_B)D^2/H$ , where  $g$  and  $\rho_A$  ( $\rho_B$ ) denotes the gravitational constant and the densities of the liquids, respectively, and the value of the shape related parameter  $1/H$  depends on the “shape factor”  $S = d/D$ .<sup>1</sup> The more the drop shape deviates from a sphere, the higher the shape factor and the lower the shape related parameter is.<sup>2</sup>

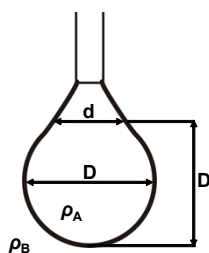

**Figure S1.** Schematic illustration of a pendant drop.

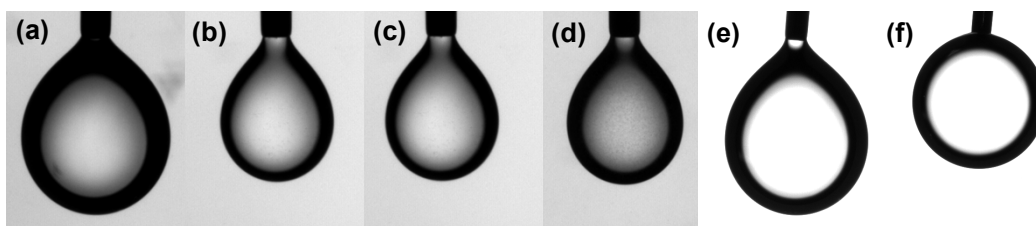

**Figure S2.** Pendant drop profiles of (a-d) chloroform in (a) water, and water containing (b) 20 vol% THF, (c) 20 vol% DMF, and (d) 15 vol% ethanol, respectively, as well as (e) 1,2-dichloroethane and (f) 1,2-dichloroethane/cyclohexane (60/40 v/v) in water. The two phases were in contact and equilibrated prior to the measurement.

**Table S1.** Pendant Drop Parameters and the Interfacial Tension Values Determined

|                                                             | $\rho_{op}$<br>(g/cm <sup>3</sup> ) | $\rho_{wp}$<br>(g/cm <sup>3</sup> ) | $S$  | $1/H$ | $\gamma_{in}$<br>(mN/m) |
|-------------------------------------------------------------|-------------------------------------|-------------------------------------|------|-------|-------------------------|
| CHCl <sub>3</sub> /H <sub>2</sub> O                         | 1.48                                | 1.00                                | 0.58 | 1.34  | 33                      |
| CHCl <sub>3</sub> /(H <sub>2</sub> O/THF 80/20)             | 1.28                                | 1.00                                | 0.63 | 1.05  | 8.8                     |
| CHCl <sub>3</sub> /(H <sub>2</sub> O/DMF 80/20)             | 1.42                                | 1.00                                | 0.61 | 1.13  | 14.4                    |
| CHCl <sub>3</sub> /(H <sub>2</sub> O/EtOH 85/15)            | 1.48                                | 0.99                                | 0.65 | 0.98  | 14.9                    |
| 1,2-dichloroethane/H <sub>2</sub> O                         | 1.26                                | 1.00                                | 0.57 | 1.32  | 28.4                    |
| (1,2-dichloroethane/<br>cyclohexane 60/40)/H <sub>2</sub> O | 1.06                                | 1.00                                | 0.31 | 6.51  | 36                      |

$\rho_{op}$  and  $\rho_{wp}$  is the density of the organic phase and the water phase, respectively;  $\gamma_{in}$  is the interfacial tension between the organic phase and the water phase;  $S$  and  $1/H$  are parameters related to the profile of the drop as defined in the text.

- (1) Drelich, J.; Fang, C.; White, C. L. In *Encyclopedia of Surface and Colloid Science*; Somasundaran, P., Ed.; Marcel Dekker Press: New York, 2002, p 3152.
- (2) Stauffer, C. E. *J. Phys. Chem.* **1965**, *69*, 1933.
